# Supplementary material for: Translation and Cross-Cultural Adaptation of the Pediatric Outcomes Data Collection Instrument into the Italian Language
Source: MDPI journal article supplement (doi:10.3390/children9060853), 2022-06-08
Supplement: s1 [file s1]

**Supplementary Table S1. Spearman rho correlation of age with Psychometric properties of Pediatric Outcome Data Collection Instrument (PODCI) Adolescent self-reported form (N=39)**

| PODCI Subscale             | T0 <sup>‡</sup> |                              | T2 <sup>†</sup> |                 |
|----------------------------|-----------------|------------------------------|-----------------|-----------------|
|                            | rho             | <i>p</i> -value <sup>*</sup> | rho             | <i>p</i> -value |
| Upper Extremity Function   | .29             | .08                          | .06             | .70             |
| Transfers & Basic Mobility | -.16            | .32                          | -.28            | .08             |
| Sport/Physical Functioning | -.17            | .30                          | -.08            | .63             |
| Pain/Comfort               | -.15            | .36                          | -.24            | .14             |
| Happiness                  | -.08            | .65                          | .04             | .79             |
| Expectations               | .02             | .90                          | .015            | .93             |
| Global Functioning         | -.14            | .38                          | -.19            | .24             |

<sup>\*</sup>  $p < 0.05$

<sup>‡</sup> T0: baseline measurement; <sup>†</sup> T2: 3-month surgical treatment follow-up measurement

**Supplementary Table S2. Spearman rho correlation of age with Psychometric properties of Pediatric Outcome Data Collection Instrument (PODCI) Parent-reported form (N=20)**

| PODCI Subscale             | T0 <sup>‡</sup> |                              | T2 <sup>†</sup> |                 |
|----------------------------|-----------------|------------------------------|-----------------|-----------------|
|                            | rho             | <i>p</i> -value <sup>*</sup> | rho             | <i>p</i> -value |
| Upper Extremity Function   | .69             | .001                         | .175            | .46             |
| Transfers & Basic Mobility | .43             | .06                          | .46             | .04             |
| Sport/Physical Functioning | .32             | .17                          | .34             | .14             |
| Pain/Comfort               | .53             | .01                          | -.01            | .97             |
| Happiness                  | -.07            | .76                          | -.01            | .95             |
| Expectations               | .61             | .004                         | .26             | .26             |
| Global Functioning         | -.36            | .12                          | .002            | .99             |

<sup>\*</sup>  $p < 0.05$

<sup>‡</sup> T0: baseline measurement; <sup>†</sup> T2: 3-month surgical treatment follow-up measurement
